# Supplementary material for: Raman characterization of pseudocapacitive behavior of polypyrrole on nanoporous gold
Source: Royal Society of Chemistry journal article supplement (doi:10.1039/c3cp54497d), 2013-11-28
Supplement: c3cp54497d.pdf [file c3cp54497d.pdf]

## Supplementary Information

### **Raman Characterization of Pseudocapacitive Behavior of Polypyrrole on Nanoporous Gold**

Y. Hou,<sup>a+</sup> L. Zhang,<sup>a+</sup> L. Y. Chen,<sup>a</sup> P. Liu,<sup>a</sup> A. Hirata<sup>a</sup> and M. W. Chen<sup>abc\*</sup>

<sup>a</sup> *WPI-Advanced Institute for Materials Research, Tohoku University, Sendai 980-8577, Japan*

<sup>b</sup> *CREST, Japan Science and Technology Agency (JST), Saitama 332-0012, Japan*

<sup>c</sup> *State Key Laboratory of Metal Matrix Composites and School of Materials Science and Engineering, Shanghai Jiao Tong University, Shanghai 200030, PR China*

*+These authors contributed equally to this work.*

\* Corresponding author. E-mail address: mwchen@wpi-aimr.tohoku.ac.jp

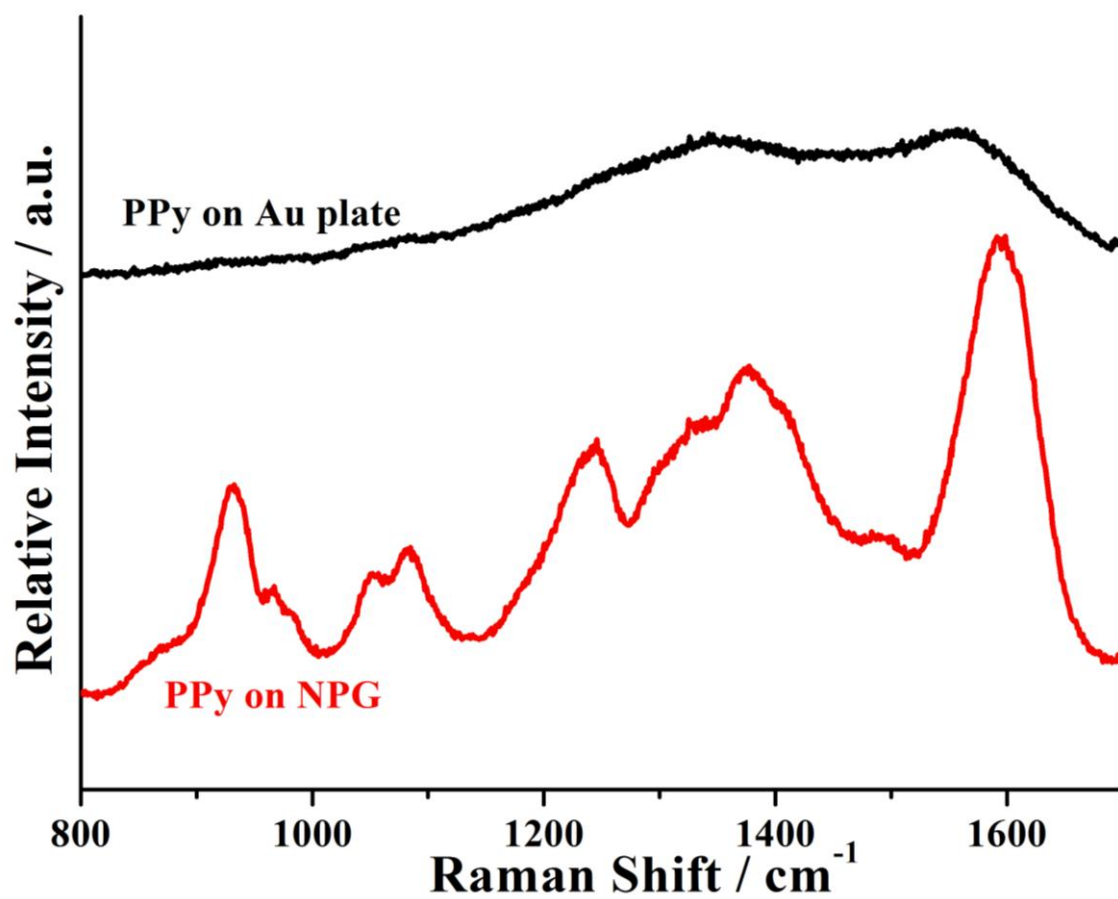

**Fig. S1.** Raman spectra of PPy electropolymerized on NPG and Au plate, respectively. Excitation laser at 632.8 nm and accumulation time is 10 s. Region between 800 and 1700 cm<sup>-1</sup>.

**Table S1.** Corresponding Raman peaks at different applied potential of the as-prepared PPy-NPG.

| Potential (V) | Wavenumbers (cm <sup>-1</sup> ) |     |      |      |      |      |
|---------------|---------------------------------|-----|------|------|------|------|
| Blank         | 933                             | 973 | 1051 | 1085 | 1581 | 1607 |
| Open          | 933                             | 972 | 1050 | 1084 | 1581 | 1605 |
| 0             | 933                             | 972 | 1051 | 1085 | 1581 | 1605 |
| 0.25          | 932                             | 970 | 1052 | 1086 | 1583 | 1603 |
| 0.50          | 932                             | 970 | 1052 | 1088 | 1584 | 1608 |
| 0.75          | 932                             | 971 | 1054 | 1089 | 1588 | 1611 |
| r0.50         | 933                             | 973 | 1052 | 1086 | 1588 | 1614 |
| r0.25         | 933                             | 972 | 1051 | 1084 | 1587 | 1615 |
| r0            | 933                             | 972 | 1050 | 1081 | 1587 | 1615 |
| Finish        | 933                             | 973 | 1050 | 1082 | 1587 | 1616 |

\*Blank refers to the sample of *ex-situ* Raman, namely the sample which detect in air without any electrolyte. Open refers to the sample has already put in the electrolyte and the electrochemical device has been connected to the electrochemical work station. The letter “r” before the number indicates the chosen potential is at the process that the potential goes reversed position which is from 0.75 V to 0 V. And the finish shows the sample without any electrolyte after CV curve measurement.

**Table S2.** Corresponding Raman peaks at different applied potential of 5000-cycled PPy-NPG.

| Potential (V) | Wavenumbers (cm <sup>-1</sup> ) |     |      |      |      |      |
|---------------|---------------------------------|-----|------|------|------|------|
| Blank         | 941                             | 987 | 1053 | 1070 | 1591 | 1626 |
| Open          | 941                             | 986 | 1053 | 1067 | 1590 | 1625 |
| 0             | 942                             | 987 | 1054 | 1071 | 1592 | 1625 |
| 0.25          | 940                             | 987 | 1053 | 1069 | 1592 | 1625 |
| 0.50          | 938                             | 987 | 1054 | 1068 | 1594 | 1626 |
| 0.75          | 936                             | 986 | 1060 | 1069 | 1595 | 1626 |
| r0.50         | 937                             | 984 | 1057 | 1068 | 1594 | 1625 |
| r0.25         | 938                             | 984 | 1056 | 1069 | 1593 | 1625 |
| r0            | 939                             | 985 | 1053 | 1069 | 1591 | 1624 |
| Finish        | 940                             | 988 | 1054 | 1070 | 1590 | 1624 |

\*Blank refers to the sample of *ex-situ* Raman, namely the sample which detect in air without any electrolyte. Open refers to the sample has already put in the electrolyte and the electrochemical device has been connected to the electrochemical work station. The letter “r” before the number indicates the chosen potential is at the process that the potential goes reversed position which is from 0.75 V to 0 V. And the finish shows the sample without any electrolyte after CV curve measurement.
